# Supplementary material for: Determination of glucose by using MoS2 nanosheets as a peroxidase mimetic enzyme
Source: Royal Society of Chemistry journal article supplement (doi:10.1039/d1nj03821d), 2021-01-01
Supplement: d1nj03821d1.pdf [file d1nj03821d1.pdf]

## Determination of Glucose by Using MoS<sub>2</sub> Nanosheets as Peroxidase Mimetic Enzyme

Rui Shi, Qiaolin He, Shiqi Cheng, Bolin Chen, and Yilin Wang

(School of Chemistry and Chemical Engineering, Guangxi Key Laboratory of Electrochemical Energy Materials, Guangxi  
University, Nanning 530004)

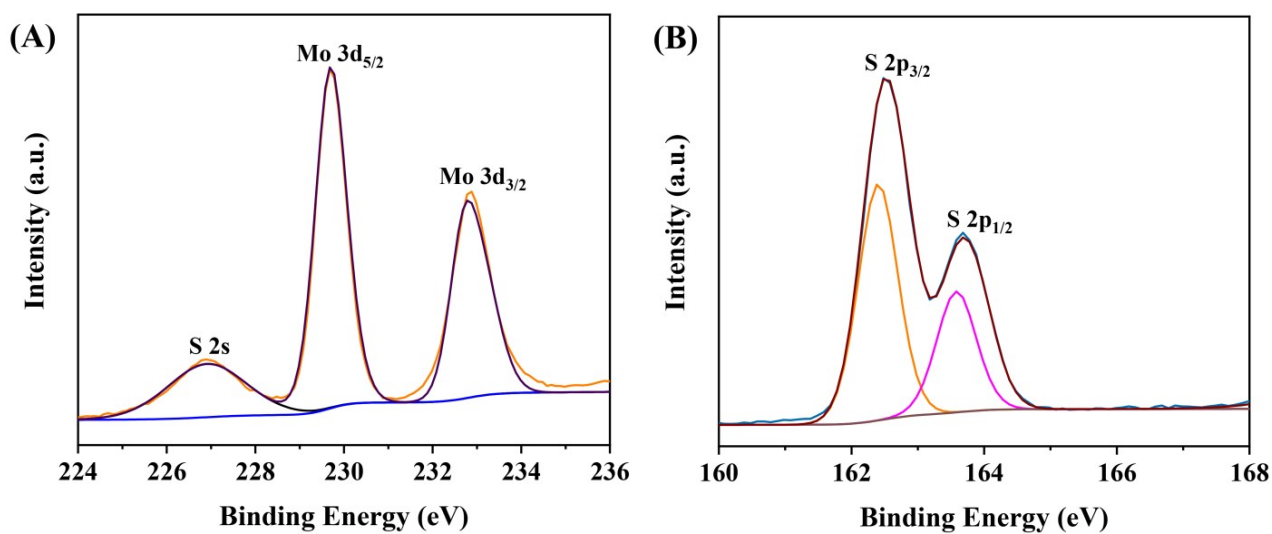

Fig.S1 (A) High resolution XPS spectra of Mo 3d; (B) High resolution XPS spectra of S 2p

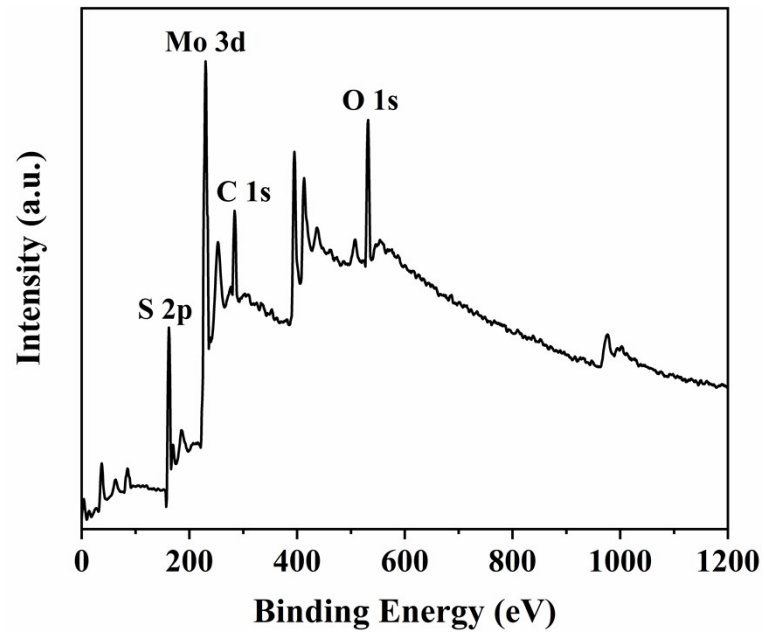

Fig.S2 XPS survey spectrum of MoS<sub>2</sub> NS after the catalytic effect on TMB

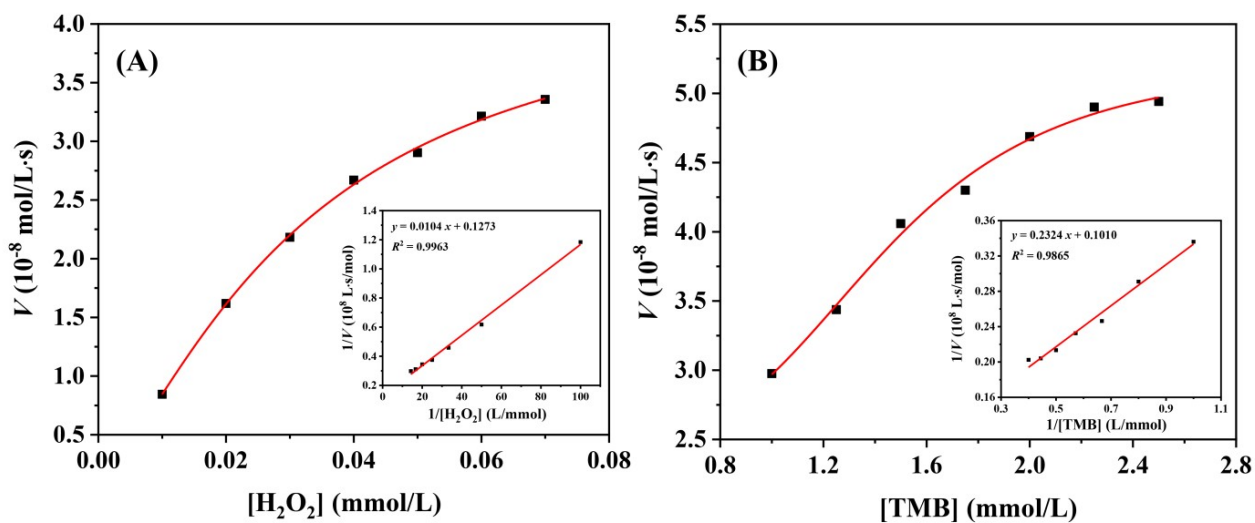

Fig.S3 Steady-state kinetic analysis for MoS<sub>2</sub>: (A) The concentration of TMB was 1 mmol/L and H<sub>2</sub>O<sub>2</sub> concentration was varied. (B) The concentration of H<sub>2</sub>O<sub>2</sub> was 0.05 mmol/L and TMB concentration was varied. Insets are the corresponding Lineweaver–Burk plots

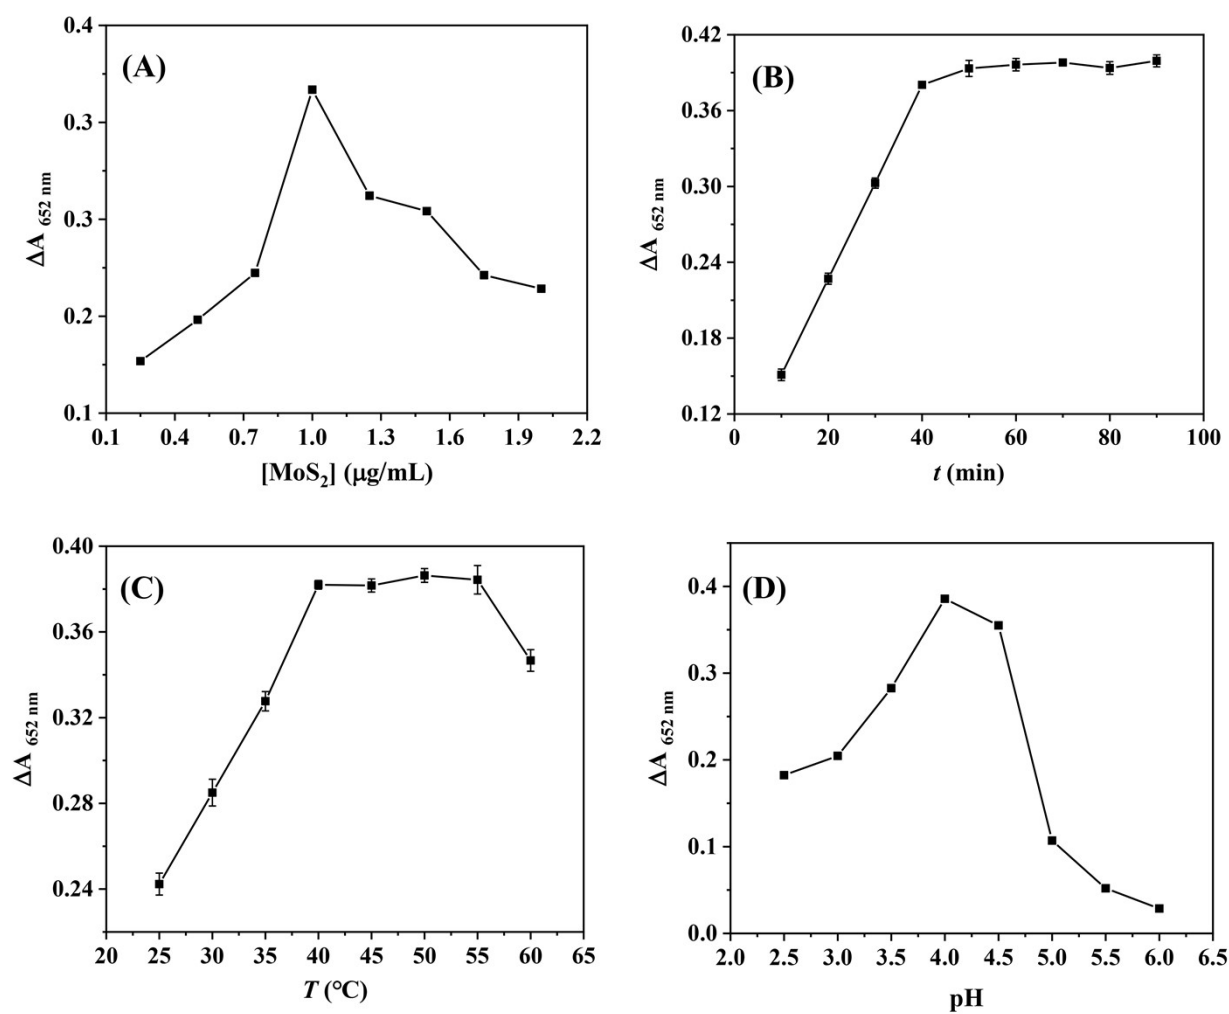

Fig.S4 Dependency of MoS<sub>2</sub> catalytic activity on (A) MoS<sub>2</sub> concentration, (B) time, (C) temperature and (D) pH value

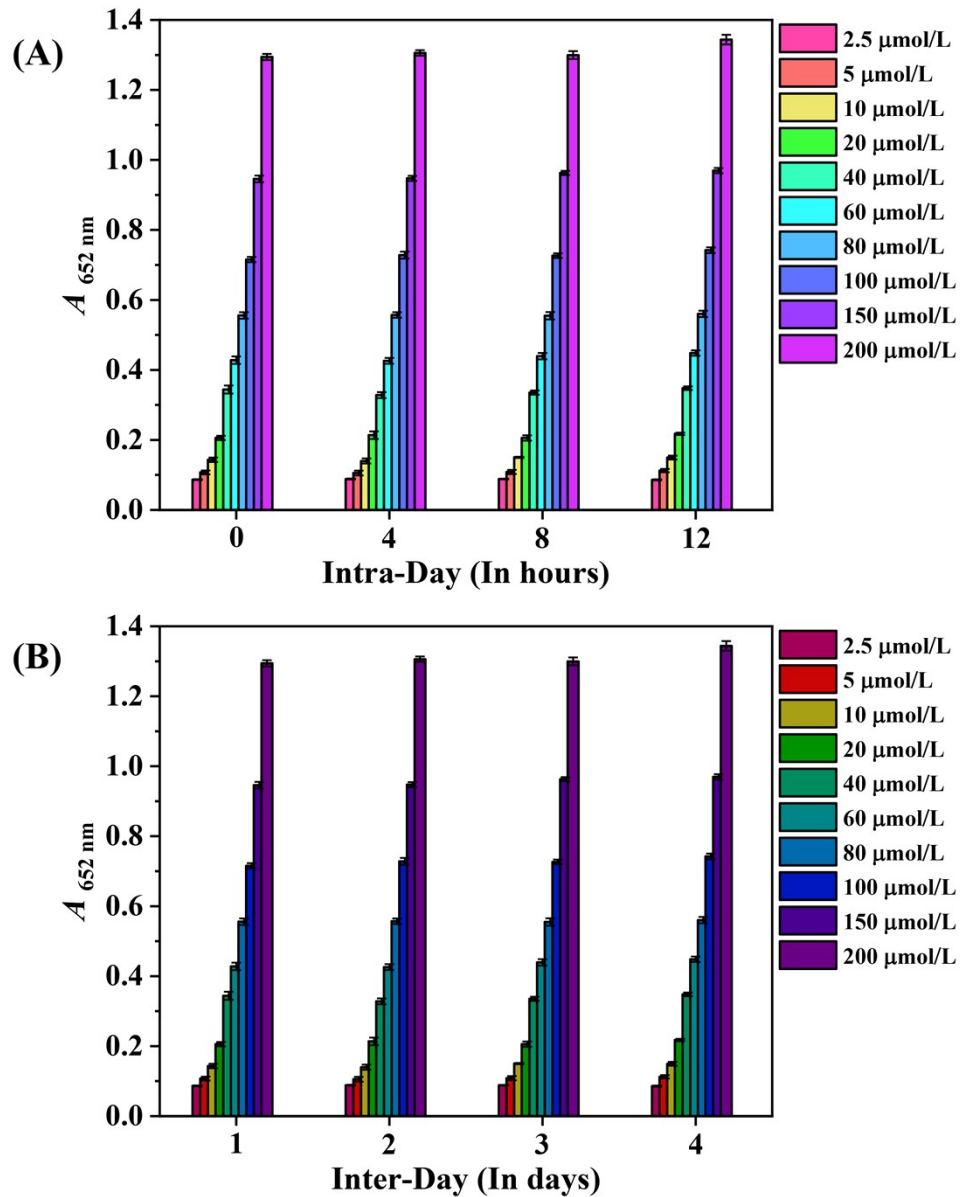

Fig.S5 The reproducibility test of developed sensing method (A) Intra-Day and (B) Inter-Day repeatability for the same set of condition for glucose (2.5 µmol/L to 200µmol/L) detection

**Table S1 Comparison of the kinetic parameters of different peroxidase mimics**

| Catalyst                                    | Substrate                     | $K_m$ /(mmol/L) | $V_{max}$ /(mol/(L s)) | References |
|---------------------------------------------|-------------------------------|-----------------|------------------------|------------|
| M-CQDs                                      | TMB                           | 0.219           | $8.82 \times 10^{-7}$  | [1]        |
|                                             | H <sub>2</sub> O <sub>2</sub> | 0.431           | $4.61 \times 10^{-6}$  |            |
| VS <sub>2</sub> NSs                         | TMB                           | 0.280           | $4.16 \times 10^{-7}$  | [2]        |
|                                             | H <sub>2</sub> O <sub>2</sub> | 3.49            | $5.57 \times 10^{-7}$  |            |
| GSF@AuNPs                                   | TMB                           | 0.00500         | $1.57 \times 10^{-6}$  | [3]        |
|                                             | H <sub>2</sub> O <sub>2</sub> | 5.98            | $2.77 \times 10^{-6}$  |            |
| Fe <sub>3</sub> O <sub>4</sub> @MIL-100(Fe) | TMB                           | 0.112           | $1.14 \times 10^{-7}$  | [4]        |
|                                             | H <sub>2</sub> O <sub>2</sub> | 0.0770          | $1.79 \times 10^{-7}$  |            |
| GQDs                                        | TMB                           | 8.00            | $1.17 \times 10^{-7}$  | [5]        |
|                                             | H <sub>2</sub> O <sub>2</sub> | 0.0100          | $7.30 \times 10^{-8}$  |            |
| PPy NPs                                     | TMB                           | 0.293           | $2.99 \times 10^{-8}$  | [6]        |
|                                             | H <sub>2</sub> O <sub>2</sub> | 0.184           | $3.65 \times 10^{-8}$  |            |
| HRP                                         | TMB                           | 0.434           | $10.0 \times 10^{-8}$  | [7]        |
|                                             | H <sub>2</sub> O <sub>2</sub> | 3.70            | $8.71 \times 10^{-8}$  |            |
| MoS <sub>2</sub>                            | TMB                           | 0.0820          | $7.86 \times 10^{-8}$  | This work  |
|                                             | H <sub>2</sub> O <sub>2</sub> | 2.30            | $9.90 \times 10^{-8}$  |            |

**Table S2 Comparison of colorimetric detection of H<sub>2</sub>O<sub>2</sub> and glucose with different nanomaterial as peroxidase mimics**

| Peroxidase mimics                      | Linear range/( $\mu$ mol/L)             |                   | Detection limit/( $\mu$ mol/L)          |                   | References |
|----------------------------------------|-----------------------------------------|-------------------|-----------------------------------------|-------------------|------------|
|                                        | H <sub>2</sub> O <sub>2</sub> detection | Glucose detection | H <sub>2</sub> O <sub>2</sub> detection | Glucose detection |            |
| GO-Fe <sub>3</sub> O <sub>4</sub>      | 1 ~ 50                                  | 2 ~ 200           | 0.32                                    | 0.74              | [8]        |
| Pt NCs                                 | 0 ~ 200                                 | 0 ~ 200           | 0.46                                    | 0.28              | [9]        |
| Fe <sub>3</sub> O <sub>4</sub> @C YSNs | 1 ~ 20                                  | 1 ~ 10            | 0.39                                    | 1.1               | [10]       |
| Por-CeO <sub>2</sub> NPs               | 10 ~ 100                                | 40 ~ 150          | 1.8                                     | 19                | [11]       |
| H <sub>2</sub> TCPP-CdS                | 4 ~ 14                                  | 18 ~ 100          | 0.40                                    | 7.0               | [12]       |
| CQDs                                   | 5 ~ 60                                  | 10 ~ 200          | 0.86                                    | 2.9               | [13]       |
| MoS <sub>2</sub>                       | 2.5 ~ 300                               | 2.5 ~ 200         | 1.6                                     | 2.1               | This work  |

## References

- [1] Subhash, C., Vikas, K. S., Pradeep, K. Y., Daraksha, B., Vijay, K., Vinay, K. P., Mahe, T., Syed, H. H., *Anal. Chim. Acta*, **2019**, *1054*, 145-156
- [2] Huang, L. J., Zhu, W. X., Zhang, W. T., Chen, K., Wang, J., Wang, R., Yang, Q. F., Hu, N., Suo, Y. R., Wang, J. L., *Microchimica Acta*, **2017**, *185*(1), 7-14
- [3] Maji, S. K., Mandal, A. K., Nguyen, K. T., Borah, P., Zhao, Y., *ACS Appl. Mater. Interfaces*, **2015**, *7*(18), 9807-9816
- [4] Wu, Y., Ma, Y., Xu, G., Wei, F., Ma, Y., Song, Q., Wang, X., Tang, T., Song, Y., Shi, M., Xu, X., Hu, Q., *Sensors Actuators B: Chem.*, **2017**, *249*, 195-202
- [5] Nirala, N. R., Abraham, S., Kumar, V., Bansal, A., Srivastava, A., Saxena, P. S., *Sensors Actuators B: Chem.*, **2015**, *218*, 42-50
- [6] Hong, C. Y., Zhang, X. X., Wu, C. Y., Chen, Q., Yang, H. F., Yang, D., Huang, Z. Y., Cai, R., Tan, W. H., *ACS Appl. Mater. Interfaces*, **2020**, *12*(49), 54426-54432
- [7] Gao, L. Z., Zhuang, J., Nie, L., Zhang, J. B., Zhang, Y., Gu, N., Wang, T. H., Feng, J., Yang, D. L., Perrett, S., Yan, X. Y., *Nat. Nanotechnol.*, **2007**, *2*(9), 577-583
- [8] Dong, Y. L., Zhang, H. G., Rahman, Z. U., Su, L., Chen, X. J., Hu, J., Chen, X. G., *Nanoscale*, **2012**, *4*(13), 3969-3976
- [9] Jin, L. H., Meng, Z., Zhang, Y. Q., Cai, S. J., Zhang, Z. H., Li, C., Shang, L., Shen, Y. H., *ACS Appl. Mater. Interfaces*, **2017**, *9*(11), 10027-10033
- [10] Lu, N., Zhang, M., Ding, L., Zheng, J., Zeng, C. X., Wen, Y. L., Liu, G., Aldalbahi, A., Shi, J. Y., Song, S. P., Zuo, X. L., Wang, L., *Nanoscale*, **2017**, *9*(13), 4508-4515
- [11] Liu, Q. Y., Yang, Y. T., Lv, X. T., Ding, Y., Zhang, Y. Z., Jing, J. J., Xu, C. X., *Sensors Actuators B: Chem.*, **2017**, *240*, 726-734
- [12] Liu, Q. Y., Jia, Q. Y., Zhu, R. R., Shao, Q., Wang, D. M., Cui, P., Ge, J. C., *Materials Science and Engineering: C*, **2014**, *42*, 177-184
- [13] Yuan, C. L., Qin, X., Xu, Y. J., Li, X. P., Chen, Y. Y., Shi, R., Wang, Y. L., *J. Photochem. Photobiol. A: Chem.*, **2020**, *396*,
